# Supplementary material for: Do we need another screw? Sacroiliac screw fixation in open-book pelvic ring injuries (APC type II)
Source: PubMed Central journal article supplement — EFORT Open Rev. 2024 Aug 1;9(8):827–36. doi: 10.1530/EOR-23-0173 (PMC11370719; doi:10.1530/eor-23-0173), 2024-08-01
Supplement: EOR-23-0173supplementary_material.pdf [file EOR-23-0173supplementary_material.pdf]

1 **Supplemental material**

2 Search strategy

3 **MEDLINE via PubMed**

4 1. ((((((Pubic Symphysis Diastasis [MeSH Terms]) OR ("symphysis dislocation"[Title/Abstract])) OR  
5 ("symphysis rupture"[Title/Abstract])) OR ("traumatic pubic diastasis"[Title/Abstract])) OR (joint,  
6 sacroiliac[MeSH Terms])) OR (pubic symphysis[MeSH Terms]) OR („Sacrum/injuries"[Mesh])

7 2. (((((((("Sacrum/surgery"[MeSH Terms]) OR ("Pubic Symphysis/surgery"[MeSH Terms])) OR ("Pubic  
8 Symphysis Diastasis/surgery"[MeSH Terms])) OR ("Sacroiliac Joint/surgery"[MeSH Terms])) OR  
9 ("Fracture Fixation, Internal"[MeSH Terms])) OR ("Pelvic Bones/surgery"[MeSH Terms])) OR  
10 ("sacroiliac screw")) OR ("posterior ring stabilization")) OR (stabilization sacroiliac joint)

11 3. #1 AND #2

12

13 **Web of Science**

14 TS=(Pubic Symphysis Diastasis OR symphysis dislocation OR symphysis rupture OR traumatic pubic  
15 diastasis OR joint sacroiliac OR pubic symphysis OR Sacrum injury) AND TS=(sacrum surgery OR pubic  
16 symphysis surgery OR pubic symphysis diastasis surgery OR sacroiliac joint surgery OR fracture  
17 fixation internal OR pelvic bone surgery OR sacroiliac screw OR posterior ring stabilization OR  
18 stabilization sacroiliac joint)

19

20 **Scopus**

21 (Pubic Symphysis Diastasis OR symphysis dislocation OR symphysis rupture OR traumatic pubic  
22 diastasis OR joint sacroiliac OR pubic symphysis OR Sacrum injury) AND (sacrum surgery OR pubic  
23 symphysis surgery OR pubic symphysis diastasis surgery OR sacroiliac joint surgery OR fracture  
24 fixation internal OR pelvic bone surgery OR sacroiliac screw OR posterior ring stabilization OR  
25 stabilization sacroiliac joint)

26

27 **The Cochrane Library**

28 Pubic Symphysis Diastasis OR symphysis dislocation OR symphysis rupture OR traumatic pubic  
29 diastasis OR joint sacroiliac OR pubic symphysis OR Sacrum injury AND sacrum surgery OR pubic  
30 symphysis surgery OR pubic symphysis diastasis surgery OR sacroiliac joint surgery OR fracture  
31 fixation internal OR pelvic bone surgery OR sacroiliac screw OR posterior ring stabilization OR  
32 stabilization sacroiliac joint

33

34 **clinicaltrials.gov**

35 (pubic symphysis dislocation OR sacroiliac OR iliosacral) AND (fixation OR screw OR stabilization)
